# Supplementary material for: Viscoelastic system from mixing cetyltrimethylammonium bromide and poly(styrene-co-methacrylic acid) in aqueous solution
Source: Royal Society of Chemistry journal article supplement (doi:10.1039/c5ra19280c), 2015-01-01
Supplement: c5ra19280c1.pdf [file c5ra19280c1.pdf]

## 1、<sup>1</sup>H-NMR

### 1.1 <sup>1</sup>H-NMR of P(St-co-MAA)(3:7)

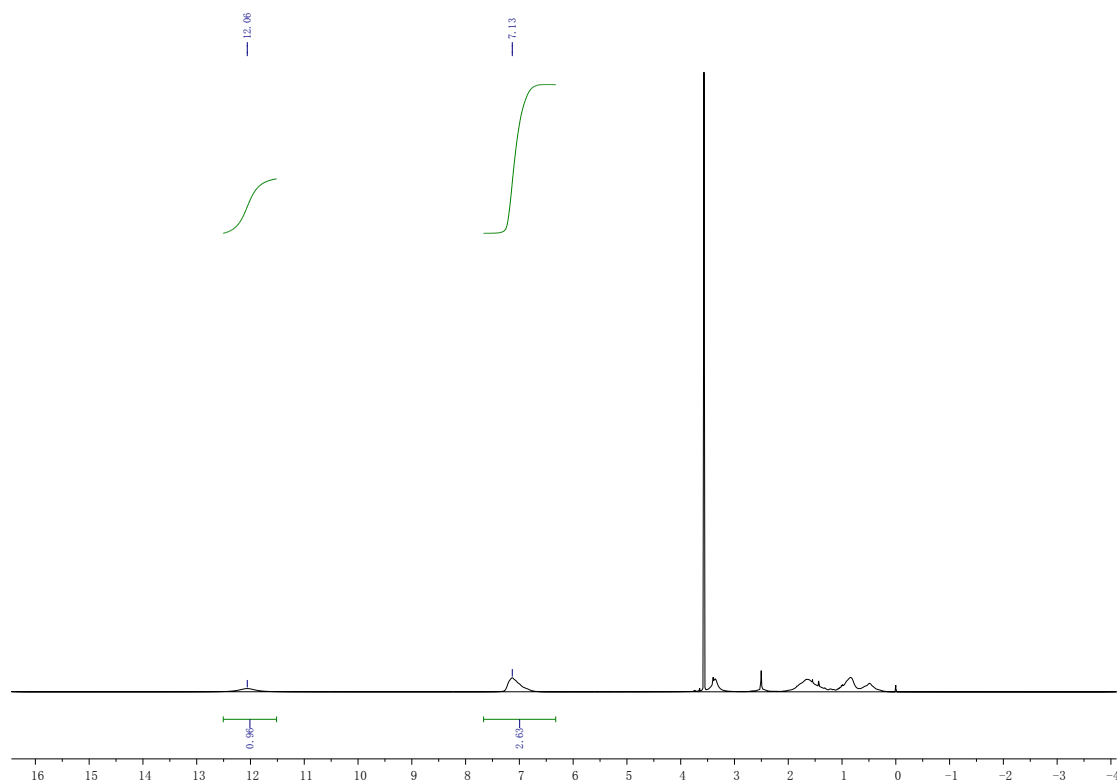

### 1.2 <sup>1</sup>H-NMR of P(St-co-MAA)(4:6)

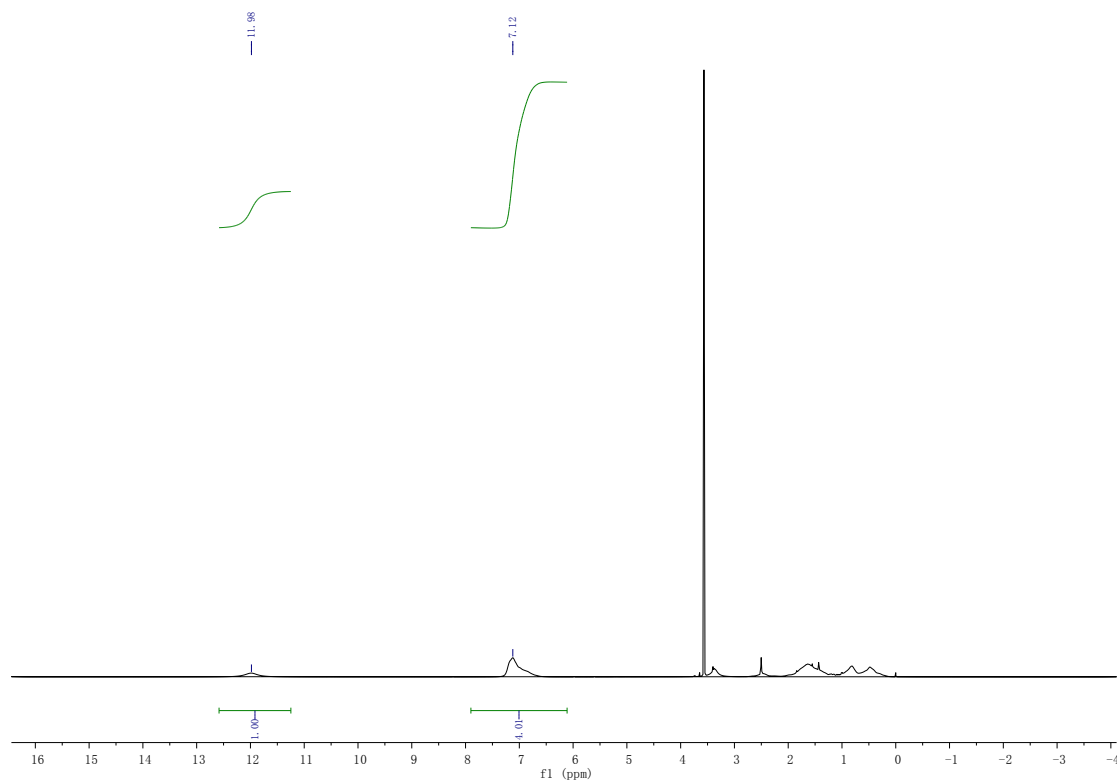

### 1.3 $^1\text{H-NMR}$ of P(St-co-MAA)(5:5)

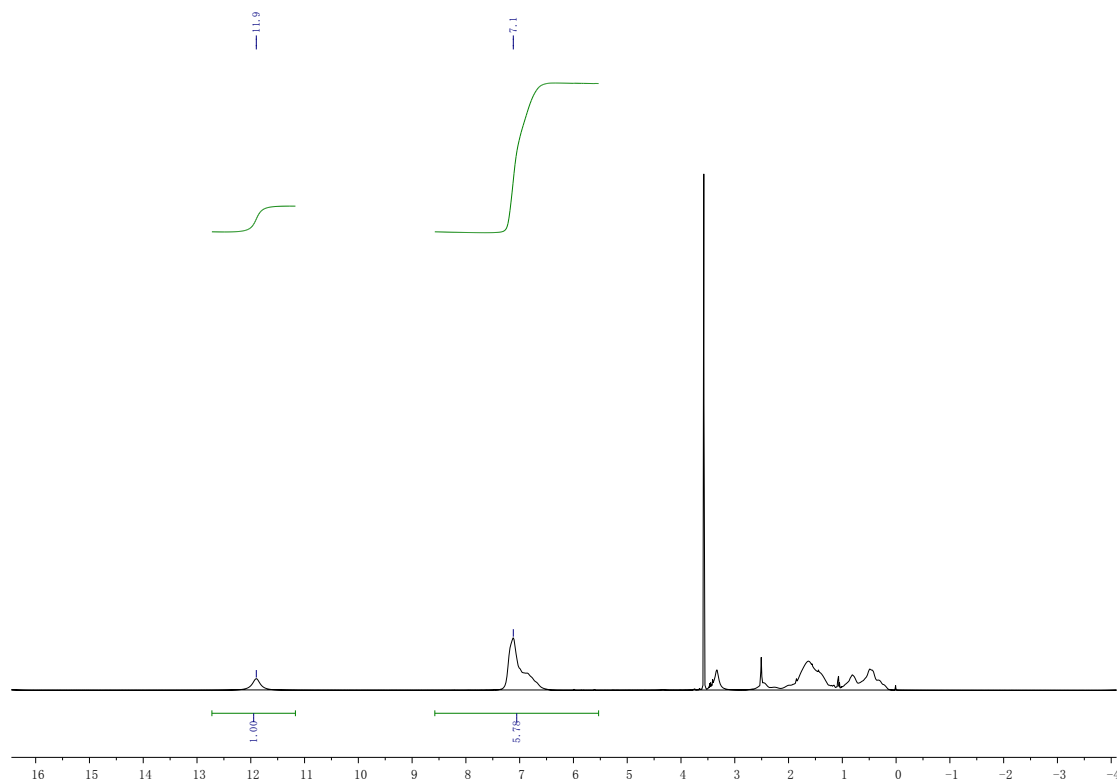

### 1.4 $^1\text{H-NMR}$ of P(St-co-MAA)(6:4)

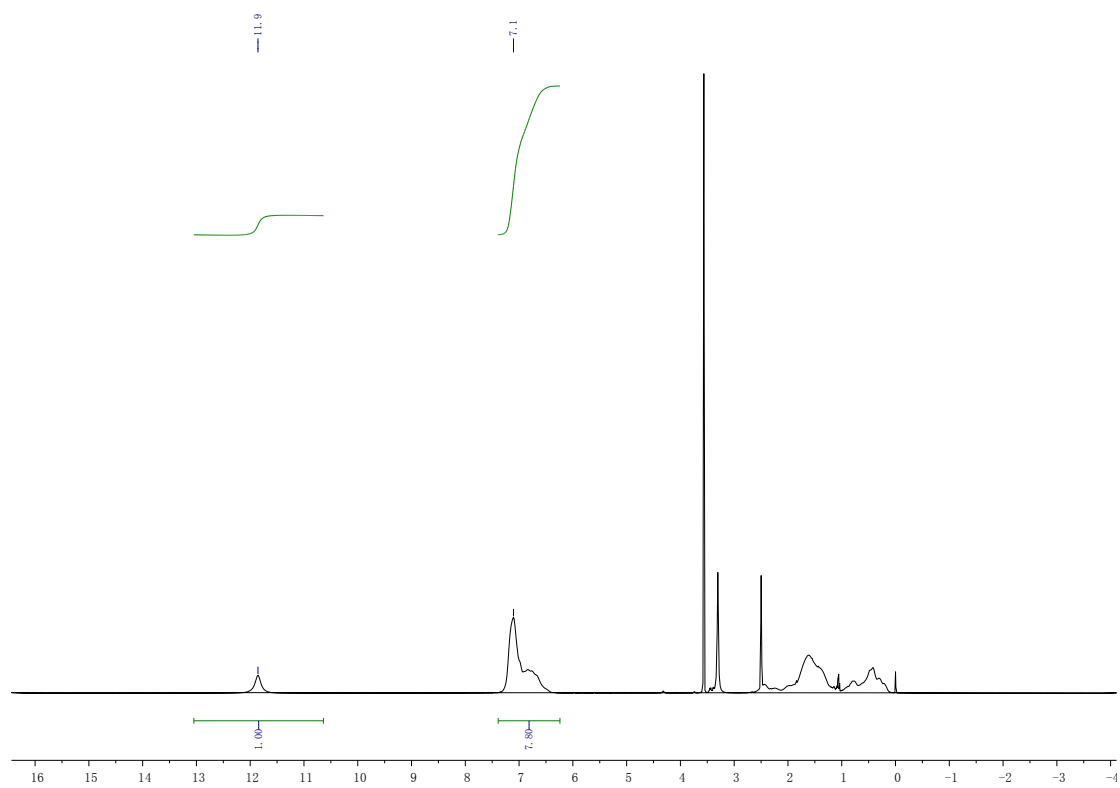

### 1.5 <sup>1</sup>H-NMR of P(St-co-MAA)(7:3)

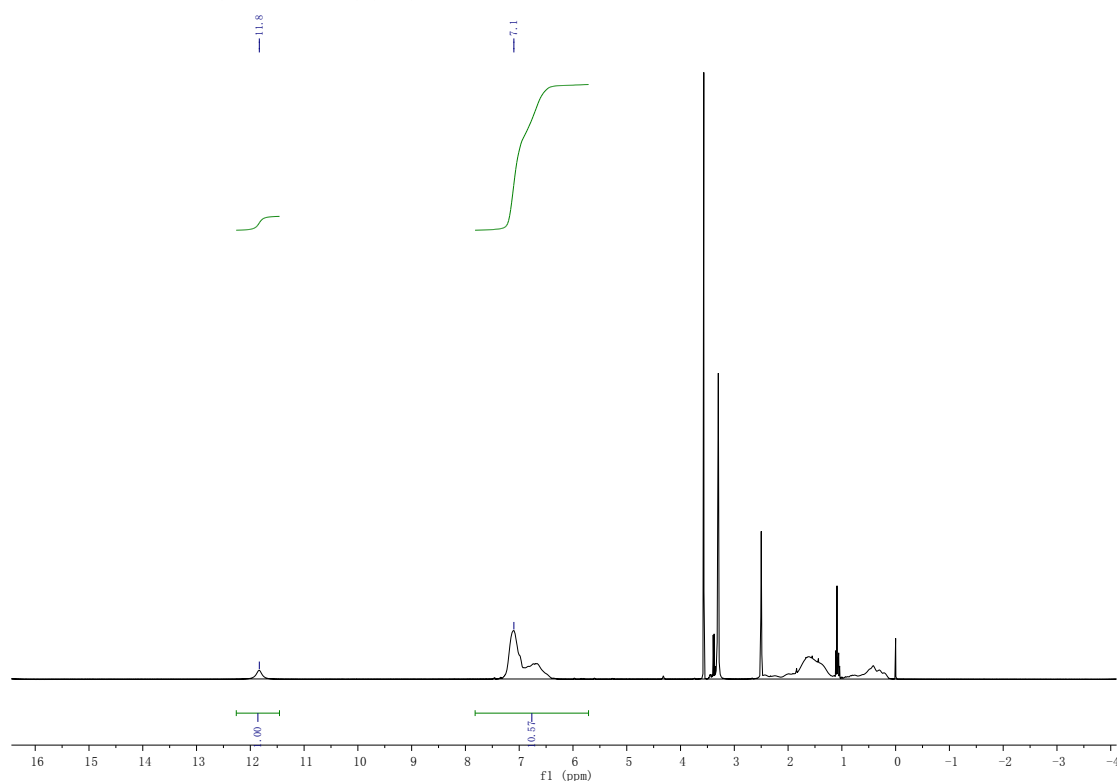

We can calculate the actual molar ratio of St to MAA by <sup>1</sup>H-NMR spectra. Formula is as follows:

$$n_{St} : n_{MAA} = \frac{\frac{1}{5} I_b}{I_a}$$

$I_b$  represents the total peak area of five protons in the mono-substituted benzene ring,  $I_a$  represents the peak area of proton in the carboxylic acid. The actual ratio of St and MAA is represented in table below:

| The mole feed ratio and the actual ratio of St and MAA in P(St-co-MAA) |            |                               |
|------------------------------------------------------------------------|------------|-------------------------------|
| the mole feed ratio of St and MAA                                      | $I_b/I_a$  | the actual ratio of St to MAA |
| 3:7 (0.43:1.00)                                                        | 2.63:1.00  | 0.53:1.00                     |
| 4:6 (0.67:1.00)                                                        | 4.01:1.00  | 0.80:1.00                     |
| 5:5 (1.00:1.00)                                                        | 5.78:1.00  | 1.16:1.00                     |
| 6:4 (1.50:1.00)                                                        | 7.80:1.00  | 1.56:1.00                     |
| 7:3 (2.33:1.00)                                                        | 11.78:1.00 | 2.35:1.00                     |

## 2.GPC

Relative molecular weight and its mass distribution of P(St-co-MAA)

| St:MAA | $M_n$ /(g/mol) | $M_w$ /(g/mol) | $M_w/M_n$ |
|--------|----------------|----------------|-----------|
| 3:7    | 55925          | 64586          | 1.15      |
| 4:6    | 55568          | 65721          | 1.18      |
| 5:5    | 54093          | 64364          | 1.19      |
| 6:4    | 54295          | 63593          | 1.17      |
| 7:3    | 69073          | 82333          | 1.19      |

## 3. Yield of Polymer

| St:MAA (planned) | St (mol) | MAA (mol) | Idea output | Real output | Yield |
|------------------|----------|-----------|-------------|-------------|-------|
| 3:7              | 0.15     | 0.35      | 41.4        | 21.38       | 51.6% |
| 4:6              | 0.20     | 0.30      | 46.6        | 24.16       | 51.8% |
| 5:5              | 0.25     | 0.25      | 47.5        | 23.26       | 49.0% |
| 6:4              | 0.30     | 0.20      | 48.4        | 22.51       | 46.5% |
| 7:3              | 0.35     | 0.35      | 49.3        | 27.52       | 55.8% |
